# Supplementary material for: Berberine-Loaded Carboxylmethyl Chitosan Nanoparticles Ameliorate DSS-Induced Colitis and Remodel Gut Microbiota in Mice
Source: Front Pharmacol. 2021 Apr 20;12:644387. doi: 10.3389/fphar.2021.644387 (PMC8093821; doi:10.3389/fphar.2021.644387)
Supplement: Supplementary file 1 [file datasheet1.doc]

# Supplementary Materials

**Berberine-loaded** **Carboxylmethyl Chitosan Nanoparticles ameliorate DSS-induced colitis and remodel gut microbiota in mice**

**Luqing Zhao1, Xueying Du2, Jiaxin Tian2, Xiuhong Kang1, Yuxin Li1, Wenlin Dai3, Danyan Li1, Shengsheng Zhang1*, Chao Li2***

1Digestive Disease Center, Beijing Hospital of Traditional Chinese Medicine, Capital Medical University, Beijing, 100010, P. R. China

2State Key Laboratory of Chemical Resource Engineering, Beijing University of Chemical Technology, Beijing 100029, P. R. China

3Center for Applied Statistics, Institute of Statistics and Big Data, Renmin University of China, Beijing 100872, P. R. China

*** Correspondence:**

Shengsheng Zhang

[zhangshengsheng@bjzhongyi.com](mailto:zhangshengsheng@bjzhongyi.com)

Chao Li
lichao@mail.buct.edu.cn


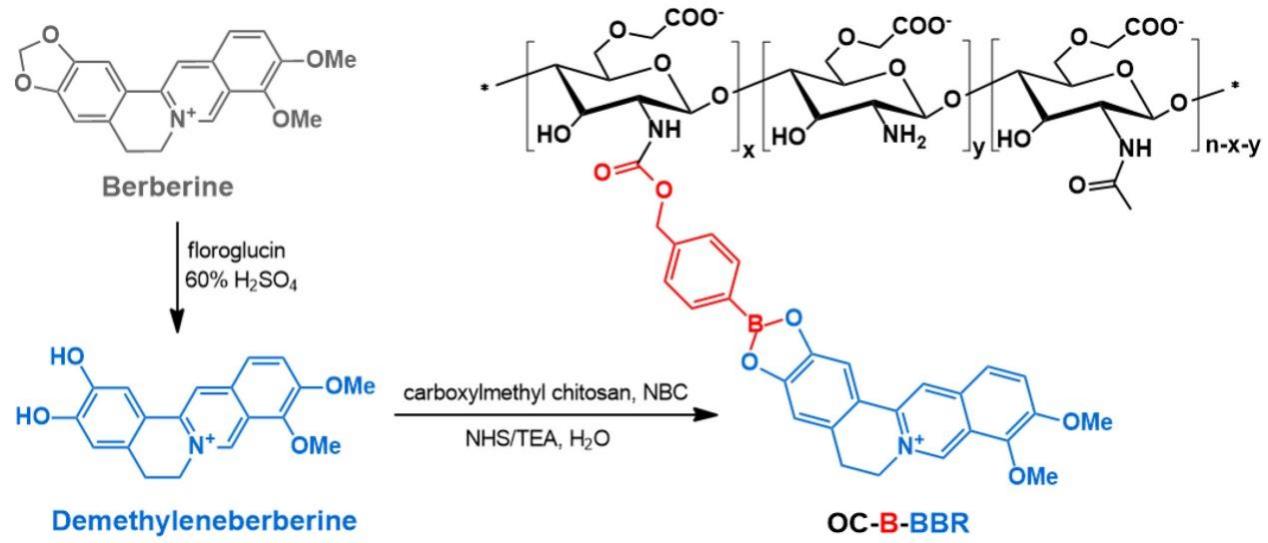


**Scheme S1**. The structure and synthetic route of **OC-B-BBR** nanoparticle.


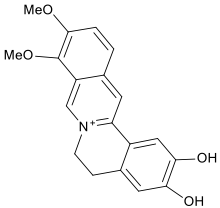


22

24

2

1

7

10

18

11

12

15

b

a

a

b

7

10

1 2

18

15

11

12

22 24

**Figure S1.** 1H-NMR of spectrum demethyleneberberine


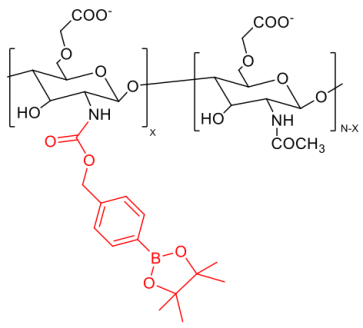


3’

5‘

4’

1

2

3

4

5

6

7

3’

4’

5‘

1

3-6

2

7

**Figure S2.** 1H-NMR spectrum of **OC-NBC**


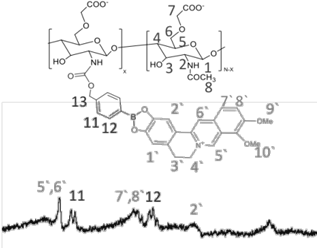


1，7，4’

3，5，6，9‘，10’

2，3‘

8

4

**Figure S3.** 1H-NMR spectrum of **OC-B-BBR**
